1 **FLOWERING LOCUS C integrates carbon and nitrogen**  
2 **signaling for the proper timing of flowering in**  
3 **Arabidopsis**

4 **Vladislav Gramma<sup>1‡#</sup>, Justyna Jadwiga Olas<sup>1‡#</sup>, Vasiliki Zacharaki<sup>2#</sup>,**  
5 **Jathish Ponnu<sup>3</sup>, Urszula Marta Luzarowska<sup>1</sup>, Magdalena Musialak-**  
6 **Lange<sup>1‡</sup>, and Vanessa Wahl<sup>1,4\*</sup>**

7 <sup>1</sup>Max Planck Institute of Molecular Plant Physiology, Department Metabolic  
8 Networks, Potsdam, Germany.

9 <sup>2</sup>Umeå Plant Science Centre, Department of Plant Physiology, Umeå  
10 University, Umeå, Sweden.

11 <sup>3</sup>Joseph Gottlieb Kölreuter Institute for Plant Sciences (JKIP), Karlsruhe  
12 Institute of Technology (KIT), Germany.

13 <sup>4</sup>The James Hutton Institute, Department of Cell and Molecular Sciences,  
14 Dundee, UK.

15 \*Corresponding author/author responsible for distribution of materials

16 #These three authors (in alphabetical order) contributed equally.

17 ‡**Current affiliations:** University of Applied Sciences Berlin (VG); Leibniz  
18 Institute of Vegetable and Ornamental Crop, Großbeeren, Germany (JJO);  
19 Metasysx GmbH, Am Mühlenberg 11, Potsdam, Germany (MML)

20 **Author emails and ORCID:**

21 [Vladislav.Gramma@HTW-Berlin.de](mailto:Vladislav.Gramma@HTW-Berlin.de) (0000-0002-9890-3042)

22 [Olas@igzev.de](mailto:Olas@igzev.de) (0000-0002-4311-6738)

23 [Vasiliki.Zacharaki@umu.se](mailto:Vasiliki.Zacharaki@umu.se) (0000-0002-5543-2332)

24 [Urszula.Luzarowska@gmail.com](mailto:Urszula.Luzarowska@gmail.com) (0000-0002-3350-5297)

25 [Jathish.Ponnu@kit.edu](mailto:Jathish.Ponnu@kit.edu) (0000-0002-3276-7068)

26 [musialak-lange@metasysx.com](mailto:musialak-lange@metasysx.com) (0000-0002-0388-8960)

27 [Vanessa.Wahl@hutton.ac.uk](mailto:Vanessa.Wahl@hutton.ac.uk) (0000-0001-7421-8801)

28 **Short title:** C and N signaling regulate FLC.

29 **Abstract**

30 The timing of flowering in plants is modulated by both carbon (C) and nitrogen  
31 (N) signaling pathways. In a previous study, we established a pivotal role of the  
32 sucrose-signaling trehalose 6-phosphate pathway in regulating flowering under  
33 N-limited short-day conditions. In this work, we expand on our finding that wild-  
34 type plants grown under N-limited short days require an active trehalose 6-  
35 phosphate pathway to be able to flower. Both wild-type plants grown under N-  
36 limited conditions and knock-down plants of *TREHALOSE PHOSPHATE*  
37 *SYNTHASE1* induce *FLOWERING LOCUS C* expression, a well-known floral  
38 repressor associated with the vernalization response. When exposed to an  
39 extended period of cold, a mutant of *FLOWERING LOCUS C* fails to respond  
40 to N availability, and flowers at the same time under N-limited and full-nutrition  
41 conditions. Our data suggest that SUCROSE NON-FERMENTING 1 RELATED  
42 KINASE 1-dependent trehalose 6-phosphate-mediated C signaling and a novel  
43 mechanism downstream of N signaling likely involving NIN-LIKE PROTEIN 7  
44 impact the expression of *FLOWERING LOCUS C*. Collectively, our data  
45 underscore the existence of a multi-factor regulatory system in which both C  
46 and N signaling pathways jointly govern the regulation of flowering in plants.

47

48 **Keywords:** TREHALOSE PHOSPHATE SYNTHASE (TPS1), Trehalose 6-  
49 phosphate (T6P), FLOWERING LOCUS C (FLC), nitrogen, N signaling,  
50 flowering time

51

## 52 **Introduction**

53 Owing to their sessile nature, plants adapt to environmental changes by  
54 modifying their development and growth. These processes require significant  
55 amounts of energy. Plants are in constant feedback with the environment and  
56 their nutrient status, especially carbon (C) and nitrogen (N), that serve as crucial  
57 bases for energy production and biomass generation. Low levels of C or N in  
58 the cells suppresses development and growth in plants and triggers the onset  
59 of senescence. To balance energy-intensive developmental processes with  
60 endogenous nutrient availability, plants have evolved intricate signaling  
61 networks (Ferne et al., 2020).

62 Flowering is an important developmental process in the life cycle of plants with  
63 correct timing being essential for reproductive success. It is regulated by a  
64 sophisticated genetic network that integrates various environmental and  
65 endogenous signals to regulate the expression of the floral integrator genes  
66 such as the florigen, *FLOWERING LOCUS T (FT)*, and *SUPPRESSOR OF*  
67 *OVEREXPRESSION OF CONSTANS 1 (SOC1)* (Srikanth and Schmid, 2011;  
68 Romera-Branchat et al., 2014; Song et al., 2015). FT integrates signals  
69 perceived in the leaves and conveys this information to the shoot apical  
70 meristem (SAM) to induce flowering (Corbesier et al., 2007; Jaeger and Wigge,  
71 2007; Mathieu et al., 2007). At the SAM, FT interacts with the bZIP transcription  
72 factor *FLOWERING LOCUS D (FD)* to form a complex that directly activates  
73 *SOC1* along with floral meristem identity genes such as *APETALA1 (AP1)* (Abe  
74 et al., 2005; Wigge et al., 2005).

75 In addition to other stimuli, temperature impacts greatly the time of flowering.  
76 Increased ambient temperature results in earlier flowering due to decreased  
77 SVP protein stability (Lee et al., 2013; Lee et al., 2014). SVP forms a  
78 temperature-dependent flowering repressor complex with partners such as  
79 *FLOWERING LOCUS M (FLM)/MADS AFFECTING FLOWERING1 (MAF1)*,  
80 an orthologue of *FLOWERING LOCUS C (FLC)* (Pose et al., 2013;  
81 Sureshkumar et al., 2016), resulting in earlier flowering when plants are  
82 exposed to warmer conditions (Pose et al., 2013). SVP was also shown to  
83 interact with FLC in a flowering repressor complex (Fujiwara et al., 2008; Li et  
84 al., 2008). This delays floral transition by directly reducing the expression of *FT*,

85 *FD*, and *SOC1* (Hepworth et al., 2002; Helliwell et al., 2006; Searle et al., 2006;  
86 Lee et al., 2007; Li et al., 2008). In winter-annual accessions of *Arabidopsis*  
87 *thaliana* (*Arabidopsis*) flowering is suppressed due to active *FRIGIDA* (*FRI*)  
88 resulting in promoted expression of *FLC*, unless the plants are exposed to a  
89 long period of cold (vernalization process) (Sheldon et al., 2000). This  
90 regulation involves a plethora of proteins and complexes acting in many layers  
91 of gene regulation, ranging from RNA structures, epigenetic modification to  
92 transcriptional and mRNA processing control (reviewed in Whittaker and Dean,  
93 2017; and Sharma et al., 2020; Xu et al., 2021; Xu et al., 2021; Yang et al.,  
94 2022).

95 Organic C and N supply is essential in particular for vegetative growth and plant  
96 development (Sulpice et al., 2013). It is known that nutrients are essential for  
97 developmental transitions (Fernie et al., 2020), but the underlying mechanisms  
98 continue to be subject to active investigation. Interestingly, *FLC* expression was  
99 observed to increase significantly in NITRATE TRANSPORTER 1.1 (*NRT1.1*)  
100 and *NRT1.13* defective mutant plants (Teng et al., 2019; Chen et al., 2021).  
101 While *NRT1.13* is suggested to be a nitrate transporter, *NRT1.1* is a key  
102 component of nitrate signaling functioning as both a transporter and a sensor  
103 in roots (Li et al., 2021). This suggests a nitrate signaling-dependent control of  
104 *FLC* as proposed by Kant and colleagues (Kant et al., 2011). This is supported  
105 by the introduction of an *frc-3* mutation into the late-flowering *NRT1.1* deficient  
106 plant background which restored wild-type flowering (Teng et al., 2019).

107 Previous studies have identified multiple factors that influence N-regulated  
108 flowering, which often vary and depend on the cultivation systems used (Lin  
109 and Tsay, 2017). We are using a soil-based N-limited system developed by  
110 (Tschoep et al., 2009), which allows plant adaptation and the investigation of  
111 flowering time without stress-related symptoms (Olas et al., 2019; Olas et al.,  
112 2021). With this system we previously reported that nitrate-regulated flowering  
113 depends on SAM factors. Notably, in N-limiting conditions, nitrate-responsive  
114 gene expression is affected and nitrate assimilation is reduced in the SAM (Olas  
115 et al., 2019). The early nitrate response involves the NIN-LIKE PROTEIN (*NLP*)  
116 transcription factors *NLP6* and *NLP7*. They accumulate in the nucleus in the  
117 presence of nitrate, regulating gene expression through nitrate responsive cis-

118 elements (NRE) (Konishi and Yanagisawa, 2013; Marchive et al., 2013).  
119 Limited nitrate availability delays flowering due to decreased expression of  
120 *SOC1*, likely through NLP6/NLP7-regulated expression of the SQUAMOSA  
121 PROMOTER-BINDING PROTEIN-LIKE transcription factors encoding genes  
122 *SPL3* and *SPL5* (Olas et al., 2019).

123 The sucrose signal trehalose 6-phosphate (T6P) regulates a plethora of  
124 developmental and physiological responses (reviewed in Fichtner and Lunn,  
125 2021). In Arabidopsis, T6P is synthesized by TREHALOSE PHOSPHATE  
126 SYNTHASE1 (*TPS1*) (Vandesteene et al., 2010; Yang et al., 2012) and it acts  
127 mainly by modulating the SUCROSE NON-FERMENTING 1 RELATED  
128 KINASE 1 (*SnRK1*) activity. Moreover, T6P was suggested to be able to bind  
129 directly to the *SnRK1* upstream activating kinases and inhibit their activity (Zhai  
130 et al., 2018). *SnRK1* is a key sensor of energy status and it is required for both  
131 normal growth and plant responses to stresses that impact plant fitness and  
132 survival (Polge and Thomas, 2007; Baena-Gonzalez and Sheen, 2008).  
133 Although single mutants of *SnRK1* catalytic subunits resemble wild-type plants  
134 (Baena-Gonzalez et al., 2007; Jeong et al., 2015), *tps1* mutants (*tps1-2*) are  
135 embryo-lethal (Eastmond et al., 2002). This can be bypassed by ectopically  
136 expressing dexamethasone-inducible *TPS1* (*GVG::TPS1*) during seed set (van  
137 Dijken et al., 2004). However, plants grown from these seeds remain in the  
138 vegetative phase for a highly extended period or fail to flower entirely (van  
139 Dijken et al., 2004; Wahl et al., 2013). T6P signaling induces flowering in leaves  
140 via *FT* and also acts at the SAM through microRNA156 (*miR156*) and its target  
141 transcripts, *SPL3-5* (Wahl et al., 2013), at least partially via the modulation of  
142 the SUCROSE NON-FERMENTING 1 RELATED KINASE 1 (*SnRK1*) complex  
143 activity (Zacharaki et al., 2022). This was supported by the observation that loss  
144 of *SnRK1* activity in the *tps1-2, GVG::TPS1* plants led to early induction of *FT*  
145 in the leaves, reduced *miR156* levels and strong induction of *SPL3* in the SAM  
146 during bolting (Zacharaki et al., 2022). Taken together these findings indicate  
147 that both C and N signaling can target the same components of the flowering  
148 network at the SAM (Wahl et al., 2013; Olas et al., 2019; Zacharaki et al., 2022),  
149 underscoring their joint importance for the proper timing of flowering.

150 Even though the current understanding implies a straightforward output  
151 downstream of nutrient signaling, our data now indicate a more complex

152 relationship between nutrient signaling and developmental programs. Here, we  
153 demonstrate that the T6P pathway, which controls flowering under N limitation  
154 in short days (Olas et al., 2019), impacts on the expression of *FLC* in addition  
155 to *FLC* being differentially expressed upon exposure to contrasting N levels.  
156 Our findings suggest that both C- and N-dependent pathways regulate  
157 Arabidopsis flowering time by modulating *FLC* expression, implying a role in  
158 the composition and timing of the FLC-SVP repressor complex within a  
159 developmental context.

160

## 161 **Results**

### 162 **Sucrose signaling represses *FLC***

163 We have previously reported that plants grown under N-limited conditions and  
164 short days (SD) accumulate both sucrose and T6P towards the end of the  
165 vegetative growth phase. Importantly, *TPS1* knock-down plants  
166 (*35S::amiRTPS1*) did not flower under these conditions (Olas et al., 2019). To  
167 understand this phenomenon, we analyzed a developmental series of rosette  
168 samples from both Col-0 and *35S::amiRTPS1* plants, focusing on candidate  
169 genes, which specifically change their expression before the floral transition.  
170 This analysis included multiple flowering time genes assessed by RT-qPCR.  
171 Notably, we found a strong up-regulation of *FLC* expression in 4- to 6-days-old  
172 and *MAF5* (*MADS AFFECTING FLOWERING 5*) expression in 12-days-old  
173 *35S::amiRTPS1* plants (Fig. 1A, Fig. S1), similar to Zeng et al. (2024).  
174 Considering that *FLC* expression has previously been suggested to be  
175 modulated in response to N availability (Kant et al., 2011), it is an interesting  
176 candidate for further investigation. We observed that *FLC* expression declines  
177 before the floral transition, which occurs at 10 days after germination (DAG) in  
178 Col-0 wild-type plants and 19 DAG in *35S::amiRTPS1* grown in full nutrition soil  
179 (Wahl et al., 2013). This suggests that the T6P pathway fundamentally  
180 contributes to the full repression of *FLC* in young seedlings. While we initially  
181 did not anticipate that the T6P pathway could affect *FLC* expression at later  
182 stages, we found that when the *flc-3* mutation is introduced into the *tps1-2*  
183 *GVG::TPS1* background, it partially rescues the late flowering and the delayed  
184 vegetative phase transition observed in this *tps1-2 GVG::TPS1* (Fig. 1B,C; Fig.  
185 S2; Table S1,2). Our data, therefore, suggest that the T6P pathway is involved  
186 in *FLC* regulation to promote flowering and facilitate the vegetative phase  
187 change.

188

### 189 ***FLC* integrates N-signaling into the flowering network**

190 It has been previously shown that flowering is delayed in wild-type plants grown  
191 in the limited N (LN) soil (Olas et al., 2019). Furthermore, some data suggest  
192 that *FLC* expression may be influenced by N availability (Kant et al., 2011).  
193 Thus, we conducted experiments to investigate the potential regulation of *FLC*  
194 expression by N status. We grew wild-type Col-0 plants in a soil-based growth

195 system (Tschoep et al., 2009), consisting of a soil with optimal N (ON) and one  
196 with LN source. We observed elevated *FLC* expression levels in LN in both  
197 rosettes and apices of Col-0 plants grown continuously in SD conditions (Fig.  
198 2A, B), and in apices of plants that were initially grown in SD conditions and  
199 subsequently transferred to LD conditions (Fig. 2C). Similarly, we found  
200 upregulation of *MAF5* levels in rosettes of LN grown plants (Fig. S3).  
201 Considering that the *MAF5* was found to act downstream of the T6P pathway,  
202 this finding suggests a link between N and T6P signaling pathways. (Fig. S1),  
203 *MAF5* was also found to be upregulated in response to N limitation (Fig. S3).  
204 Next, to obtain information on the expression pattern at higher spatial  
205 resolution, we used *FLC* as a probe and performed RNA *in situ* hybridization  
206 (Fig. 2D). *FLC* transcript was detectable at the SAM and in young leaves of LN  
207 grown plants, confirming our previous observations that limited N availability  
208 enhances *FLC* expression in plants. This finding suggests that *FLC* plays a role  
209 in the regulation of flowering time in response to N availability.

210 It is well established that exposure to low temperatures decreases *FLC*  
211 expression in plants (Searle et al., 2006). For this reason, we grew wild-type  
212 plants at 4°C in SD for 8 weeks, followed by a transfer to 22°C until flowering.  
213 This treatment resulted in wild-type plants flowering at the same time in both N  
214 regimes, suggesting that *FLC* contributes to the delayed flowering time  
215 observed in plants grown in the LN soil (Fig. 3A; Table S1).

216 *FLC* is known to form a flowering repressor complex with *SVP* to suppress  
217 *SOC1* at the SAM (Li et al., 2008). Unlike *FLC*, *SVP* was not differentially  
218 expressed in either LN-grown plants or *TPS1* knock-down plants (Fig. S4; Fig.  
219 S5). Importantly, neither *flc-3* nor *svp-32* mutant plants responded to the  
220 reduced N content in the LN soil (Fig. 3B; Table S1), flowering at the same time  
221 in ON and LN conditions. This indicates that both *FLC* and *SVP* play a role in  
222 the N-dependent regulation of flowering time.

223

#### 224 **N-signaling affects *FLC* via *NLP7***

225 *NLPs* are key regulators of nitrate sensing and signaling, with *NLP6* and *NLP7*  
226 being two of the most well-characterized members of this family in *Arabidopsis*  
227 (Fredes et al., 2019). In the presence of nitrate, *NLP7* is retained in the nucleus



228 through phosphorylation, where it binds to NREs present in N-responsive  
229 genes to promote their expression (Konishi and Yanagisawa, 2013).  
230 Interestingly, we observed a significant reduction of *FLC* expression in the *nlp7-*  
231 *1* mutant, indicating that an active NLP7 modulates *FLC* expression when N is  
232 not limited (Fig. 4).

233 Since the *FLC* gene does not carry an NRE in its promoter, genomic or  
234 downstream sequences, we expanded our analysis to include other flowering  
235 time genes that regulate *FLC* (Table S3). Notably, *FRI*, a key regulator  
236 upstream of *FLC*, has four putative NREs (Table S3). However, in the Col-0  
237 background, the *FRI* locus encodes an inactive protein and therefore does not  
238 influence *FLC*. In addition to *FRI*, other genomic loci encoding *FLC* regulators  
239 were also found with putative NREs (Table S3), but their expression was  
240 unaffected under N limited conditions (Fig. S6). This was also the case in  
241 *35S::amiRTPS1* plants (Fig. S7). Taken together, this suggests that *FLC*  
242 suppression involves an as yet unknown transcription factor(s), whose activity  
243 is regulated by NLP7.

244

#### 245 **Sucrose and N-signals interconnect at the level of *FLC* for coordinated** 246 **flowering time regulation**

247 We have previously demonstrated that the T6P pathway and sufficient nitrate  
248 levels are necessary for floral induction in SD (Olas et al., 2019). The fact that  
249 *35S::amiRTPS1* plants fail to flower when N is limited and that *FLC* expression  
250 is modulated by N availability, prompted us to test whether *FLC* is a target of  
251 both N signaling and the T6P pathway.

252 We observed that *FLC* transcription was elevated in rosettes of wild-type plants  
253 grown under SD with limited N which was even more pronounced in  
254 *35S::amiRTPS1* plants (Fig. 5A). This suggests an additive effect between N  
255 signaling and the T6P pathway, both converging on the *SPL3-5* node at the  
256 SAM (Wahl et al., 2013; Olas et al., 2019). To test whether *FLC* could be  
257 regulated through *SPL3-5*, we measured its expression in *spl345* mutants (Xie  
258 et al., 2020). However, *FLC* expression in rosette leaves of *spl345* mutants was  
259 comparable to that of wild-type plants (Fig. S8A), indicating that both pathways  
260 regulate *FLC* expression via another mechanism. Similarly to *FLC*, we did not

261 observe any difference in *SVP* expression in *sp/345* compared to Col-0 plants  
262 (Fig. S8B).

263 The T6P pathway is known to function by directly modulating SnRK1 activity  
264 (Zhang et al., 2009). Loss of SnRK1 activity restores flowering of *tps1* mutants  
265 in LD by initial induction of *FT* in the leaves and subsequent suppression of  
266 miR156 followed by SPLs induction in the SAM (Zacharaki et al., 2022). Thus,  
267 we tested whether *FLC* regulation in *tps1* mutants is also mediated by SnRK1.  
268 We found that indeed *FLC* expression was increased in the *tps1 GVG::TPS1*  
269 mutant where SnRK1 is fully active. Interestingly, introducing non-catalytically  
270 active mutations in SnRK1 within the *tps1 GVG::TPS1* background restores  
271 *FLC* expression to wild-type levels in both rosette leaves and apex tissue (Fig.  
272 5B,C). The suppression of *FLC* in the double mutant is more pronounced in the  
273 apex than the rosette leaves, underscoring the critical role of the T6P pathway  
274 in controlling developmental transitions. Our data suggest that *FLC* expression  
275 is regulated by both nitrate and sugar availability via NPLs and the T6P pathway  
276 through the SnRK1 complex, respectively (Fig. 6).

277

## 278 **Discussion**

279 C and N are essential for plant growth and development and the ability of plants  
280 to properly sense their availability is crucial due to their sessile nature. C in the  
281 form of sucrose is produced via photosynthesis in the leaves while N can be  
282 taken up in both inorganic forms, as nitrate and ammonia, or organic forms, as  
283 amino acids.

284 In *Arabidopsis*, a key sugar sensor is the T6P pathway which functions via  
285 SnRK1 activity. The T6P pathway has a key role in plants' developmental  
286 transitions, such as flowering. So far, it has been shown that both *miR156* and  
287 *FT* regulation in the SAM and leaves, respectively, are required for *tps1* plants  
288 to complete their transition to flowering (Wahl et al., 2013; Ponnu et al., 2020).  
289 Here we found that *FLC*, a repressor of flowering, is also regulated by the T6P  
290 pathway (Fig. 1A) and that loss of functional *FLC* partially restores flowering in  
291 *tps1* (Fig. 1B,C). Although, we do not expect that *FLC* regulation is the prime  
292 target of the T6P pathway under normal growth conditions, it could represent  
293 an additional mechanism to prevent flowering under non-optimal growth  
294 conditions.

295 Plants experiencing a sudden shift to colder temperatures have increased  
296 amounts sucrose previously proposed to serve as a freezing protectant and  
297 concomitant rising T6P levels (reviewed in Stitt and Hurry, 2002; Carillo et al.,  
298 2013). During long cold exposure, *FLC* is suppressed and this regulation  
299 involves several mechanisms, ranging from RNA structures to epigenetic  
300 control. *FLC* suppression allows induction of *FT* and *SOC1* and flowering to  
301 commence (Whittaker and Dean, 2017). In this scenario, when plants  
302 experience cooler temperatures, nutrients that provide plants with C and N, are  
303 transported and stored to serve as a basis for rapid growth for when conditions  
304 are optimal again or used and metabolically transformed into cryoprotectants  
305 to protect the cells from freezing damage (Kaplan et al., 2007). Thus, in sub-  
306 optimal growth conditions, the T6P pathway might contribute to the suppression  
307 of *FLC* in response to the C status.

308 N availability is a key factor in the regulation of plants' developmental processes  
309 and phase transitions including the timing of flowering (Klebs, 1913; Dickens  
310 and Van Staden, 1988; Bernier et al., 1993; Olas et al., 2019). Arabidopsis  
311 cultivated on synthetic substrates exhibit early flowering in response to reduced  
312 N levels (Castro Marin et al., 2011; Kant et al., 2011; Liu et al., 2013).  
313 Conversely, soil-grown plants subjected to N limitation flower later than those  
314 cultivated in soil without N limitation, which we previously linked to the induction  
315 of *SPL3* and *SPL5* by *NLP6* and *NLP7* (Olas et al., 2019). In this study we  
316 discovered that this phenotype can additionally be explained by significantly  
317 elevated levels of *FLC* under N limitation (Fig. 2A-D). Furthermore, we found  
318 that flowering time in plants with suppressed *FLC* due to the vernalization  
319 response or with a non-functional *flc-3* allele is independent of N availability  
320 (Fig. 3A,B). These results demonstrate that despite the general belief that *FLC*  
321 does not play a major role in the regulation of flowering time in rapid-cycling  
322 accessions, such as Col-0, *FLC* is required for fine-tuning the timing of floral  
323 transition downstream of N signaling. Similar to *flc-3*, *svp-32* mutants flower at  
324 the same time in the ON and LN soils (Fig. 3B), suggesting a role of *SVP* in N-  
325 dependent flowering time regulation. However, in contrast to *FLC*, *SVP* is not  
326 differentially expressed in plants grown in ON and LN soil (Fig. S5). *FLC* and  
327 *SVP* proteins form a flowering repressor complex that delays floral transition by  
328 directly reducing the expression of *FT* and *SOC1* (Hepworth et al., 2002;

329 Helliwell et al., 2006; Lee et al., 2007; Li et al., 2008). Given that both functional  
330 *FLC* and *SVP* loci are required for the adjustment of flowering time in response  
331 to N availability, it is likely that the N signal is integrated at the level of the FLC-  
332 *SVP* complex. In this scenario, the formation of the repressor complex would  
333 be tuned by the adjustment of *FLC* expression downstream of N-signaling.  
334 Several transcription factors that are transcriptionally responsive to the N status  
335 have been identified as prime responsive genes to N availability (Vidal et al.,  
336 2015). NLPs are transcription factors facilitating nitrate signaling in plants, with  
337 NLP6 and NLP7 representing the master regulators and the two most studied  
338 (Fredes et al., 2019). In the absence of nitrate, NLP7 localizes strictly to the  
339 cytosol, while exposure to nitrate triggers its localization into the nucleus where  
340 it binds directly to NREs of nitrate-regulated genes (Konishi and Yanagisawa,  
341 2013; Marchive et al., 2013). Since NREs are not present in the *FLC* locus  
342 (Table S3), it is unlikely to be directly controlled by NLPs. Other examples of  
343 *FLC* regulation related to N availability, are the *nrt1.1* and *nrt1.13*, mutants of  
344 the nitrate sensor and transporter NRT1.1 and transporter NRT1.13 (Teng et  
345 al., 2019; Chen et al., 2021). Similar to our findings (Fig. S7), expression of  
346 known upstream regulators of *FLC* was not changed in *nrt1.13*, suggesting that  
347 NRT1.13 regulates *FLC* expression and flowering time independently of these  
348 known pathways (Chen et al., 2021).

349 Interestingly, we found that *FLC* was significantly downregulated in the late  
350 flowering *nlp7-1* and *nlp6-2 nlp7-1* mutants grown on standard soil (Fig. 4A,  
351 Fig. S9) indicating that NLP7 plays a role in the modulation of *FLC* expression.  
352 Given the fact that NLP7 was found to control most of the nitrate-related gene  
353 response (Marchive et al., 2013; Alvarez et al., 2020), the *nlp7-1* mutant is  
354 thought to mimic a low nitrate state. Hence, this result appears to contradict our  
355 observation of *FLC* accumulation in LN-grown plants (Fig. 2A,B). This could be  
356 explained by the presence of an unknown NLP-independent mechanism  
357 responsible for *FLC* upregulation in LN conditions. However, it should be noted  
358 that in contrast to the mutant background, functional NLP7 is still present in  
359 wild-type plants exposed to limited N. Thus, *nlp7-1* might not entirely mimic the  
360 low-nitrate state after all and the absence of a functional NLP7 likely leads to  
361 compensation by other NLPs. Furthermore, NLP proteins contain a PB1  
362 domain, which mediates protein-protein interactions influencing NLP activity

363 (Konishi and Yanagisawa, 2019). Given this, NLP7 might form a complex with  
364 an unknown *FLC* repressor, thereby preventing its nuclear localization under  
365 low-nitrate conditions. In the absence of NLP7 or when plants are grown under  
366 optimal N conditions, this potential repressor would localize into the nucleus,  
367 leading to a repression of *FLC* expression. It will be interesting to further dissect  
368 the mechanisms of *FLC* regulation downstream of N-signaling in the future.  
369 Our data demonstrate that both the T6P and N-signaling pathways possibly  
370 affect *FLC* expression via different mechanisms. Previous studies have  
371 demonstrated that both pathways act via the miR156/SPLs node (Wahl et al.,  
372 2013; Olas et al., 2019; Ponnu et al., 2020; Zacharaki et al., 2022). In particular,  
373 the expression of *SPL3* and *SPL5* is reduced in plants grown in N-limited  
374 environment (Bi et al., 2007; Pant et al., 2009; Krapp et al., 2011; Liang et al.,  
375 2012; Fischer et al., 2013), suggesting a role for the miR156/SPL3/5 module in  
376 the regulation of flowering time when N is limited. Similarly, the T6P pathway  
377 acts via miR156 downregulation and SPL3-5 upregulation to induce flowering  
378 and the vegetative phase change (Wahl et al., 2013; Ponnu et al., 2020;  
379 Zacharaki et al., 2022). Although both pathways converge on the miR156/SPLs  
380 module, *FLC* regulation seems to be independent (Fig. S8).  
381 T6P has a key role in promoting growth and development by suppressing  
382 SnRK1 complex activity, via direct binding to the SnRK1 upstream kinases  
383 (Zhai et al., 2018). In a previous study, it was shown that *FT* was induced in the  
384 double *tps1-2 GVG::TPS1 kin10-5* and *tps1-2 GVG::TPS1 snf4* mutant as early  
385 as in wild-type plants (Zacharaki et al., 2022). Although this early *FT* induction  
386 promoted the floral transition in wild-type plants within a few days, this was not  
387 the case in both double mutants. The elevated expression of *FLC* in rosette  
388 leaves of these mutants (Fig. 5C) could thus at least partially explain this  
389 phenomenon. *FLC* downregulation is directly correlated with early *FT*  
390 upregulation previously observed in the double mutants (Zacharaki et al.,  
391 2022). Interestingly, we observed that *FLC* was also downregulated in the  
392 double mutants in the apex (Fig. 5B) with more striking differences later on,  
393 coinciding with the timing of floral transition (Zacharaki et al., 2022). In addition,  
394 ectopic *FLC* expression in the SAM has been associated with delayed flowering  
395 and reduced *SOC1* and *FD* expression (Sheldon et al., 2002; Noh and  
396 Amasino, 2003; Searle et al., 2006). This is also the case in *tps1-2 GVG::TPS1*,

397 while gene expression is restored in the double mutants (Fig. S10) (Zacharaki  
398 et al., 2022). Our data combined with the findings of Zeng et al. (2024) suggest  
399 that the regulation of SnRK1 activity is essential for T6P-dependent floral  
400 induction, which has several modes of action throughout the floral network to  
401 ensure that sufficient energy is available for this demanding developmental  
402 transition. Finally, our findings shed further light on the multifactorial aspects of  
403 C- and N-dependent regulation of flowering time.

404

## 405 **Material and Methods**

### 406 Plant material and growth conditions

407 *Arabidopsis thaliana* plants used for this study are of the Columbia (Col-0)  
408 ecotype. Mutant and transgenic lines such as *flc-3*, *svp-32*, *35S::amiRTPS1*,  
409 *tps1-2,GVG::TPS1*, *tps1-2,GVG::TPS1,kin10-5*, *tps1-2,GVG::TPS1,snf4-1*,  
410 *nlp6-2*, *nlp7-1*, *nlp6-2,nlp7-1* and *spl345* were previously described (Michaels  
411 and Amasino, 1999; Lee et al., 2007; Wahl et al., 2013; Olas et al., 2019; Xie  
412 et al., 2020; Zacharaki et al., 2022). The *flc-3,tps1-2,GVG::TPS1* double mutant  
413 lines were generated by crossing. Genotypes were confirmed by a genotyping  
414 PCR using the oligonucleotides listed in Table S4.

415 *Arabidopsis* plants were grown in controlled growth chambers (Model E-36L,  
416 Percival Scientific Inc., Perry, IA, USA) at 22°C in long-day (LD, 16h light/8h  
417 dark) or short-day (SD, 8h dark/16h light) conditions. Light intensity was  
418 approximately 160  $\mu\text{mol}/\text{m}^2\text{s}$ . Controlled induction of flowering was performed  
419 by transferring the plants from non-inductive (SD) to inductive conditions (LD)  
420 as described (Schmid et al., 2003).

421 A previously established, almost natural, soil-based N-limited growth system  
422 consisting of ON and LN soil was used to grow plants (Tschoep et al., 2009).  
423 Briefly, the growth system consists of two types of peat-based soil mixtures with  
424 either an optimal level of N (ON, ~850 mg (N)/kg) or a limited level of N (LN,  
425 ~40 mg (N)/kg). Soil mixtures were prepared as described (Olas et al., 2019).

### 426 Phenotypic analyses

427 Flowering time was defined as days to flowering (DTF), which describes the  
428 days after germination to the day of bolting (inflorescence length 0.5cm), and  
429 by the total number of leaves (TLN). At least 16 plants were used to determine  
430 flowering time of each genotype. For vegetative phase change, juvenile leaf  
431 numbers were recorded and the leaf shape was digitally documented as  
432 described (Ponnu et al., 2020). A student's *t*-test was used to test the  
433 significance of the phenotypic differences.

### 434 Reverse transcription quantitative PCR (RT-qPCR)

435 Sampling, RNA extraction and RT-qPCR analysis of *FLC* in the *tps1-*  
436 *2,GVG::TPS1*, *tps1-2,GVG::TPS1,kin10-5* and *tps1-2,GVG::TPS1,snf4-1* were

437 performed as described (Zacharaki et al., 2022). RNA extraction and RT-qPCR  
438 analyses of all the other genes were performed according to Wahl et al. (2013).  
439 Relative expression values were calculated with the  $2^{-\Delta\Delta C_t}$  method using  $C_t$   
440 values of a housekeeping gene index of *TUB2* (At5g62690), *SAND*  
441 (At2g28390), *UBQ10* (At4g05320), and *PDF2* (At1g13320). RT-qPCR  
442 analyses were performed in three or four biological replicates (n=3 or 4). A  
443 Student's *t*-test was used to test for statistical significance.

#### 444 RNA *in situ* hybridization

445 Wax embedding, sectioning, RNA *in situ* hybridization, and imaging were  
446 performed as described (Wahl et al., 2013; Gramma and Wahl, 2023). Probes  
447 were synthesized using the DIG RNA Labeling Kit (Roche, Mannheim,  
448 Germany) for CDS of the *FLC* gene cloned into the pGEM®-T Easy vector  
449 (Promega, Madison, Wisconsin, US). Oligonucleotides and construct IDs are  
450 listed in Table S4.

451

#### 452 **Accession numbers**

453 TPS1 (At1g78580), FLC (At5g10140), SVP (At2g22540), MAF5 (At5g65080),  
454 FCA (At2g19520), EMF1 (At5g11530), PIE1/SNF2 (At3g12810), NLP6  
455 (At1g64530), NLP7 (At4g24020), FRI (At4g00650), SUF4 (At1g30970), ELF7  
456 (At1g79730), SEF (At5g37055), VRN1 (At3g18990), VRN2 (At4g16845),  
457 EMF2/CYR1 (At5g51230), TFL2 (At5g17690), FVE (At2g19520), HUA2  
458 (At2g19520), SNF4 (At1g09020), KIN10 (At3g01090), SPL3 (At2g33810),  
459 SPL4 (At1g53160), SPL5 (At3g15270).

460

#### 461 **Data availability**

462 The data supporting the findings of this study are included in this manuscript or  
463 the supplemental information and material can be obtained from the  
464 corresponding author upon reasonable request.



465 **Acknowledgments and Funding**

466 We thank Rob Hancock, Markus Schmid and the Wahl group for discussions  
467 and comments on the manuscript, Armin Schlereth, Christin Abel, Kerstin  
468 Zander, and Sebastian Kindermann for technical support. Work in the Wahl  
469 group was supported by the BMBF (031B0191), the DFG (SPP1530:  
470 WA3639/1-2, 2-1), the Max Planck Society and the James Hutton Institute.

471

472 **Author's contribution**

473 VW conceived and designed the experiments and prepared the figures. All  
474 authors performed essential experiments and analyzed data: JJO and VW  
475 performed the RNA *in situ* hybridizations; VG, JJO, VZ, and MML the RT-  
476 qPCRs; JJO, UML and JP performed phenotypic analyses. VG, VZ and VW  
477 wrote the manuscript with contributions from the other authors. All authors have  
478 read and commented on the text and figures within this manuscript.

479

480

481 **References**

482

483 **Abe M, Kobayashi Y, Yamamoto S, Daimon Y, Yamaguchi A, Ikeda Y,**  
484 **Ichinoki H, Notaguchi M, Goto K, Araki T** (2005) FD, a bZIP protein mediating  
485 signals from the floral pathway integrator FT at the shoot apex. *Science* **309**:  
486 1052-1056

487 **Alvarez JM, Schinke AL, Brooks MD, Pasquino A, Leonelli L, Varala K, Safi**  
488 **A, Krouk G, Krapp A, Coruzzi GM** (2020) Transient genome-wide interactions  
489 of the master transcription factor NLP7 initiate a rapid nitrogen-response  
490 cascade. *Nat Commun* **11**: 1157

491 **Baena-Gonzalez E, Rolland F, Thevelein JM, Sheen J** (2007) A central  
492 integrator of transcription networks in plant stress and energy signalling. *Nature*  
493 **448**: 938-942

494 **Baena-Gonzalez E, Sheen J** (2008) Convergent energy and stress signaling.  
495 *Trends Plant Sci* **13**: 474-482

496 **Bernier G, Havelange A, Houssa C, Petitjean A, Lejeune P** (1993)  
497 Physiological Signals That Induce Flowering. *Plant Cell* **5**: 1147-1155

498 **Bi YM, Wang RL, Zhu T, Rothstein SJ** (2007) Global transcription profiling  
499 reveals differential responses to chronic nitrogen stress and putative nitrogen  
500 regulatory components in Arabidopsis. *BMC Genomics* **8**: 281

501 **Carillo P, Feil R, Gibon Y, Satoh-Nagasawa N, Jackson D, Blasing OE, Stitt**  
502 **M, Lunn JE** (2013) A fluorometric assay for trehalose in the picomole range.  
503 *Plant Methods* **9**: 21

504 **Castro Marin I, Loef I, Bartetzko L, Searle I, Coupland G, Stitt M, Osuna D**  
505 (2011) Nitrate regulates floral induction in Arabidopsis, acting independently of  
506 light, gibberellin and autonomous pathways. *Planta* **233**: 539-552

507 **Chen HY, Lin SH, Cheng LH, Wu JJ, Lin YC, Tsay YF** (2021) Potential  
508 transceptor AtNRT1.13 modulates shoot architecture and flowering time in a  
509 nitrate-dependent manner. *Plant Cell* **33**: 1492-1505

510 **Corbesier L, Vincent C, Jang S, Fornara F, Fan Q, Searle I, Giakountis A,**  
511 **Farrona S, Gissot L, Turnbull C, Coupland G** (2007) FT protein movement  
512 contributes to long-distance signaling in floral induction of Arabidopsis. *Science*  
513 **316**: 1030-1033

514 **Dickens CWS, Van Staden J** (1988) The In Vitro Flowering of Kalanchöe  
515 blossfeldiana Poellniz: I. ROLE OF CULTURE CONDITIONS AND  
516 NUTRIENTS. *Journal of Experimental Botany* **39**: 461-471

517 **Eastmond PJ, van Dijken AJ, Spielman M, Kerr A, Tissier AF, Dickinson**  
518 **HG, Jones JD, Smeekens SC, Graham IA** (2002) Trehalose-6-phosphate  
519 synthase 1, which catalyses the first step in trehalose synthesis, is essential for  
520 Arabidopsis embryo maturation. *Plant J* **29**: 225-235

521 **Fernie AR, Bachem CWB, Helariutta Y, Neuhaus HE, Prat S, Ruan YL, Stitt**  
522 **M, Sweetlove LJ, Tegeder M, Wahl V, Sonnewald S, Sonnewald U** (2020)  
523 Synchronization of developmental, molecular and metabolic aspects of source-  
524 sink interactions. *Nat Plants* **6**: 55-66

525 **Fichtner F, Lunn JE** (2021) The Role of Trehalose 6-Phosphate (Tre6P) in  
526 Plant Metabolism and Development. *Annu Rev Plant Biol* **72**: 737-760

527 **Fischer JJ, Beatty PH, Good AG, Muench DG** (2013) Manipulation of  
528 microRNA expression to improve nitrogen use efficiency. *Plant Sci* **210**: 70-81

- 529 **Fredes I, Moreno S, Diaz FP, Gutierrez RA** (2019) Nitrate signaling and the  
530 control of Arabidopsis growth and development. *Curr Opin Plant Biol* **47**: 112-  
531 118
- 532 **Fujiwara S, Oda A, Yoshida R, Niinuma K, Miyata K, Tomozoe Y, Tajima T,**  
533 **Nakagawa M, Hayashi K, Coupland G, Mizoguchi T** (2008) Circadian clock  
534 proteins LHY and CCA1 regulate SVP protein accumulation to control flowering  
535 in Arabidopsis. *Plant Cell* **20**: 2960-2971
- 536 **Grama V, Wahl V** (2023) RNA In Situ Hybridization on Plant Tissue Sections:  
537 Expression Analysis at Cellular Resolution. *Methods Mol Biol* **2686**: 331-350
- 538 **Helliwell CA, Wood CC, Robertson M, Peacock WJ, Dennis ES** (2006) The  
539 Arabidopsis FLC protein interacts directly in vivo with SOC1 and FT chromatin  
540 and is part of a high-molecular-weight protein complex. *Plant Journal* **46**: 183-  
541 192
- 542 **Hepworth SR, Valverde F, Ravenscroft D, Mouradov A, Coupland G** (2002)  
543 Antagonistic regulation of flowering-time gene SOC1 by CONSTANS and FLC  
544 via separate promoter motifs. *EMBO J* **21**: 4327-4337
- 545 **Jaeger KE, Wigge PA** (2007) FT protein acts as a long-range signal in  
546 Arabidopsis. *Curr Biol* **17**: 1050-1054
- 547 **Jeong EY, Seo PJ, Woo JC, Park CM** (2015) AKIN10 delays flowering by  
548 inactivating IDD8 transcription factor through protein phosphorylation in  
549 Arabidopsis. *BMC Plant Biol* **15**: 110
- 550 **Kant S, Peng M, Rothstein SJ** (2011) Genetic regulation by NLA and  
551 microRNA827 for maintaining nitrate-dependent phosphate homeostasis in  
552 arabidopsis. *PLoS Genet* **7**: e1002021
- 553 **Kaplan F, Kopka J, Sung DY, Zhao W, Popp M, Porat R, Guy CL** (2007)  
554 Transcript and metabolite profiling during cold acclimation of Arabidopsis  
555 reveals an intricate relationship of cold-regulated gene expression with  
556 modifications in metabolite content. *Plant J* **50**: 967-981
- 557 **Klebs G** (1913) *Über des Verhältnis der Aubenwelt zur Entwicklung der*  
558 *Pflanze. Sitz-Ber. Akad. Wiss. Heidelberg Ser. B* **5**: 3-47
- 559 **Konishi M, Yanagisawa S** (2013) Arabidopsis NIN-like transcription factors  
560 have a central role in nitrate signalling. *Nat Commun* **4**: 1617
- 561 **Konishi M, Yanagisawa S** (2019) The role of protein-protein interactions  
562 mediated by the PB1 domain of NLP transcription factors in nitrate-inducible  
563 gene expression. *BMC Plant Biol* **19**: 90
- 564 **Krapp A, Berthome R, Orsel M, Mercey-Boutet S, Yu A, Castaings L,**  
565 **Eltieh S, Major H, Renou JP, Daniel-Vedele F** (2011) Arabidopsis roots and  
566 shoots show distinct temporal adaptation patterns toward nitrogen starvation.  
567 *Plant Physiol* **157**: 1255-1282
- 568 **Lee JH, Park SH, Lee JS, Ahn JH** (2007) A conserved role of SHORT  
569 VEGETATIVE PHASE (SVP) in controlling flowering time of Brassica plants.  
570 *Biochimica Et Biophysica Acta-Gene Structure and Expression* **1769**: 455-461
- 571 **Lee JH, Ryu HS, Chung KS, Pose D, Kim S, Schmid M, Ahn JH** (2013)  
572 Regulation of temperature-responsive flowering by MADS-box transcription  
573 factor repressors. *Science* **342**: 628-632
- 574 **Lee JH, Sook Chung K, Kim SK, Ahn JH** (2014) Post-translational regulation  
575 of SHORT VEGETATIVE PHASE as a major mechanism for thermoregulation  
576 of flowering. *Plant Signal Behav* **9**: e28193

- 577 **Lee JH, Yoo SJ, Park SH, Hwang I, Lee JS, Ahn JH** (2007) Role of SVP in  
578 the control of flowering time by ambient temperature in Arabidopsis. *Genes Dev*  
579 **21**: 397-402
- 580 **Li D, Liu C, Shen L, Wu Y, Chen H, Robertson M, Helliwell CA, Ito T,**  
581 **Meyerowitz E, Yu H** (2008) A repressor complex governs the integration of  
582 flowering signals in Arabidopsis. *Developmental Cell* **15**: 110-120
- 583 **Li L, Liu KH, Sheen J** (2021) Dynamic Nutrient Signaling Networks in Plants.  
584 *Annu Rev Cell Dev Biol* **37**: 341-367
- 585 **Liang G, He H, Yu D** (2012) Identification of nitrogen starvation-responsive  
586 microRNAs in Arabidopsis thaliana. *PLoS One* **7**: e48951
- 587 **Lin YL, Tsay YF** (2017) Influence of differing nitrate and nitrogen availability on  
588 flowering control in Arabidopsis. *J Exp Bot* **68**: 2603-2609
- 589 **Liu T, Li Y, Ren J, Qian Y, Yang X, Duan W, Hou X** (2013) Nitrate or NaCl  
590 regulates floral induction in Arabidopsis thaliana. *Biologia* **68**: 215-222
- 591 **Marchive C, Roudier F, Castaings L, Brehaut V, Blondet E, Colot V, Meyer**  
592 **C, Krapp A** (2013) Nuclear retention of the transcription factor NLP7  
593 orchestrates the early response to nitrate in plants. *Nat Commun* **4**: 1713
- 594 **Mathieu J, Warthmann N, Kuttner F, Schmid M** (2007) Export of FT protein  
595 from phloem companion cells is sufficient for floral induction in Arabidopsis.  
596 *Curr Biol* **17**: 1055-1060
- 597 **Michaels SD, Amasino RM** (1999) FLOWERING LOCUS C encodes a novel  
598 MADS domain protein that acts as a repressor of flowering. *Plant Cell* **11**: 949-  
599 956
- 600 **Noh YS, Amasino RM** (2003) PIE1, an ISWI family gene, is required for FLC  
601 activation and floral repression in Arabidopsis. *Plant Cell* **15**: 1671-1682
- 602 **Olas JJ, Apelt F, Watanabe M, Hoefgen R, Wahl V** (2021) Developmental  
603 stage-specific metabolite signatures in Arabidopsis thaliana under optimal and  
604 mild nitrogen limitation. *Plant Sci* **303**: 110746
- 605 **Olas JJ, Van Dingenen J, Abel C, Dzialo MA, Feil R, Krapp A, Schlereth A,**  
606 **Wahl V** (2019) Nitrate acts at the Arabidopsis thaliana shoot apical meristem  
607 to regulate flowering time. *New Phytol*
- 608 **Pant BD, Musialak-Lange M, Nuc P, May P, Buhtz A, Kehr J, Walther D,**  
609 **Scheible WR** (2009) Identification of nutrient-responsive Arabidopsis and  
610 rapeseed microRNAs by comprehensive real-time polymerase chain reaction  
611 profiling and small RNA sequencing. *Plant Physiol* **150**: 1541-1555
- 612 **Polge C, Thomas M** (2007) SNF1/AMPK/SnRK1 kinases, global regulators at  
613 the heart of energy control? *Trends Plant Sci* **12**: 20-28
- 614 **Ponnu J, Schlereth A, Zacharaki V, Dzialo MA, Abel C, Feil R, Schmid M,**  
615 **Wahl V** (2020) The trehalose 6-phosphate pathway impacts vegetative phase  
616 change in Arabidopsis thaliana. *Plant J* **104**: 768-780
- 617 **Pose D, Verhage L, Ott F, Yant L, Mathieu J, Angenent GC, Immink RG,**  
618 **Schmid M** (2013) Temperature-dependent regulation of flowering by  
619 antagonistic FLM variants. *Nature* **503**: 414-417
- 620 **Romera-Branchat M, Andres F, Coupland G** (2014) Flowering responses to  
621 seasonal cues: what's new? *Curr Opin Plant Biol* **21**: 120-127
- 622 **Schmid M, Uhlenhaut NH, Godard F, Demar M, Bressan R, Weigel D,**  
623 **Lohmann JU** (2003) Dissection of floral induction pathways using global  
624 expression analysis. *Development* **130**: 6001-6012
- 625 **Searle I, He Y, Turck F, Vincent C, Fornara F, Krober S, Amasino RA,**  
626 **Coupland G** (2006) The transcription factor FLC confers a flowering response

- 627 to vernalization by repressing meristem competence and systemic signaling in  
628 Arabidopsis. *Genes Dev* **20**: 898-912
- 629 **Sharma N, Geuten K, Giri BS, Varma A** (2020) The molecular mechanism of  
630 vernalization in Arabidopsis and cereals: role of Flowering Locus C and its  
631 homologs. *Physiol Plant* **170**: 373-383
- 632 **Sheldon CC, Conn AB, Dennis ES, Peacock WJ** (2002) Different regulatory  
633 regions are required for the vernalization-induced repression of FLOWERING  
634 LOCUS C and for the epigenetic maintenance of repression. *Plant Cell* **14**:  
635 2527-2537
- 636 **Sheldon CC, Rouse DT, Finnegan EJ, Peacock WJ, Dennis ES** (2000) The  
637 molecular basis of vernalization: the central role of FLOWERING LOCUS C  
638 (FLC). *Proc Natl Acad Sci U S A* **97**: 3753-3758
- 639 **Song YH, Shim JS, Kinmonth-Schultz HA, Imaizumi T** (2015) Photoperiodic  
640 flowering: time measurement mechanisms in leaves. *Annu Rev Plant Biol* **66**:  
641 441-464
- 642 **Srikanth A, Schmid M** (2011) Regulation of flowering time: all roads lead to  
643 Rome. *Cell Mol Life Sci* **68**: 2013-2037
- 644 **Stitt M, Hurry V** (2002) A plant for all seasons: alterations in photosynthetic  
645 carbon metabolism during cold acclimation in Arabidopsis. *Curr Opin Plant Biol*  
646 **5**: 199-206
- 647 **Sulpice R, Nikoloski Z, Tschoep H, Antonio C, Kleessen S, Larhlimi A,**  
648 **Selbig J, Ishihara H, Gibon Y, Fernie AR, Stitt M** (2013) Impact of the carbon  
649 and nitrogen supply on relationships and connectivity between metabolism and  
650 biomass in a broad panel of Arabidopsis accessions. *Plant Physiol* **162**: 347-  
651 363
- 652 **Sureshkumar S, Dent C, Seleznev A, Tasset C, Balasubramanian S** (2016)  
653 Nonsense-mediated mRNA decay modulates FLM-dependent thermosensory  
654 flowering response in Arabidopsis. *Nat Plants* **2**: 16055
- 655 **Teng Y, Liang Y, Wang M, Mai H, Ke L** (2019) Nitrate Transporter 1.1 is  
656 involved in regulating flowering time via transcriptional regulation of  
657 FLOWERING LOCUS C in Arabidopsis thaliana. *Plant Sci* **284**: 30-36
- 658 **Tschoep H, Gibon Y, Carillo P, Armengaud P, Szecowka M, Nunes-Nesi A,**  
659 **Fernie AR, Koehl K, Stitt M** (2009) Adjustment of growth and central  
660 metabolism to a mild but sustained nitrogen-limitation in Arabidopsis. *Plant Cell*  
661 *Environ* **32**: 300-318
- 662 **van Dijken AJ, Schluepmann H, Smeekens SC** (2004) Arabidopsis  
663 trehalose-6-phosphate synthase 1 is essential for normal vegetative growth and  
664 transition to flowering. *Plant Physiol* **135**: 969-977
- 665 **Vandesteene L, Ramon M, Le Roy K, Van Dijck P, Rolland F** (2010) A single  
666 active trehalose-6-P synthase (TPS) and a family of putative regulatory TPS-  
667 like proteins in Arabidopsis. *Mol Plant* **3**: 406-419
- 668 **Vidal EA, Alvarez JM, Moyano TC, Gutierrez RA** (2015) Transcriptional  
669 networks in the nitrate response of Arabidopsis thaliana. *Curr Opin Plant Biol*  
670 **27**: 125-132
- 671 **Wahl V, Ponnu J, Schlereth A, Arrivault S, Langenecker T, Franke A, Feil**  
672 **R, Lunn JE, Stitt M, Schmid M** (2013) Regulation of flowering by trehalose-6-  
673 phosphate signaling in Arabidopsis thaliana. *Science* **339**: 704-707
- 674 **Whittaker C, Dean C** (2017) The FLC Locus: A Platform for Discoveries in  
675 Epigenetics and Adaptation. *Annu Rev Cell Dev Biol* **33**: 555-575

676 **Wigge PA, Kim MC, Jaeger KE, Busch W, Schmid M, Lohmann JU, Weigel**  
677 **D** (2005) Integration of spatial and temporal information during floral induction  
678 in Arabidopsis. *Science* **309**: 1056-1059  
679 **Xie Y, Zhou Q, Zhao Y, Li Q, Liu Y, Ma M, Wang B, Shen R, Zheng Z, Wang**  
680 **H** (2020) FHY3 and FAR1 Integrate Light Signals with the miR156-SPL Module-  
681 Mediated Aging Pathway to Regulate Arabidopsis Flowering. *Mol Plant* **13**:  
682 483-498  
683 **Xu C, Fang X, Lu T, Dean C** (2021) Antagonistic cotranscriptional regulation  
684 through ARGONAUTE1 and the THO/TREX complex orchestrates FLC  
685 transcriptional output. *Proc Natl Acad Sci U S A* **118**  
686 **Xu C, Wu Z, Duan HC, Fang X, Jia G, Dean C** (2021) R-loop resolution  
687 promotes co-transcriptional chromatin silencing. *Nat Commun* **12**: 1790  
688 **Yang HL, Liu YJ, Wang CL, Zeng QY** (2012) Molecular evolution of trehalose-  
689 6-phosphate synthase (TPS) gene family in Populus, Arabidopsis and rice.  
690 *PLoS One* **7**: e42438  
691 **Yang M, Zhu P, Cheema J, Bloomer R, Mikulski P, Liu Q, Zhang Y, Dean**  
692 **C, Ding Y** (2022) In vivo single-molecule analysis reveals COOLAIR RNA  
693 structural diversity. *Nature* **609**: 394-399  
694 **Zacharaki V, Ponnu J, Crepin N, Langenecker T, Hagemann J, Skorzinski**  
695 **N, Musialak-Lange M, Wahl V, Rolland F, Schmid M** (2022) Impaired KIN10  
696 function restores developmental defects in the Arabidopsis trehalose 6-  
697 phosphate synthase1 (tps1) mutant. *New Phytol* **235**: 220-233  
698 **Zeng L, Zacharaki V, Wang Y, Schmid M** (2024) Mutations in HUA2 restore  
699 flowering in the Arabidopsis trehalose 6-phosphate synthase1 (tps1) mutant.  
700 *bioRxiv*: 2024.2001.2031.578264  
701 **Zhai Z, Keereetaweeep J, Liu H, Feil R, Lunn JE, Shanklin J** (2018) Trehalose  
702 6-Phosphate Positively Regulates Fatty Acid Synthesis by Stabilizing  
703 WRINKLED1. *Plant Cell* **30**: 2616-2627  
704 **Zhang Y, Primavesi LF, Jhurrea D, Andralojc PJ, Mitchell RA, Powers SJ,**  
705 **Schluepmann H, Delatte T, Wingler A, Paul MJ** (2009) Inhibition of SNF1-  
706 related protein kinase1 activity and regulation of metabolic pathways by  
707 trehalose-6-phosphate. *Plant Physiol* **149**: 1860-1871  
708

709

710 **Figure legends**

711

712 **Figure 1. The Trehalose 6-phosphate pathway impacts on *FLOWERING***

713 ***LOCUS C*. (A)** Expression of *FLOWERING LOCUS C* measured by RT-qPCR

714 in rosettes of Col-0 and *35S::amiRTPS1* plants grown under long days (16h

715 light/ 8h darkness).  $n = 4$ . **(B)** Flowering time measured as leaf numbers (rosette

716 leaves in gray; cauline leaves in white).  $n \geq 15$  individual plants per genotype.

717 **(C)** Representative photographs of the plants analyzed in (B). Abbreviations:

718 days after germination (DAG). Data represents mean, error bars are standard

719 deviations (s.d.), statistically significant difference compared to Col-0 wild-type

720 (Student *t*-test, \* $P < 0.05$ , \*\* $P < 0.01$ , and \*\*\* $P < 0.001$ ).

721 **Figure 2. *FLOWERING LOCUS C* in response to nitrogen limitation. (A, B)**

722 Expression of *FLOWERING LOCUS C* measured by RT-qPCR in rosettes (A)

723 and apices (B) of Col-0 plants grown in optimal nitrogen (ON) and limited-

724 nitrogen (LN) conditions under short days (8h light/ 16h dark). **(C)** *FLOWERING*

725 *LOCUS C* expression measured by RT-qPCR in apices of plants initially grown

726 under short days (30 days) and then transferred to long days to initiate the floral

727 transition for 3, 5, and 7 days. **(D)** RNA *in situ* hybridization using *FLOWERING*

728 *LOCUS C* specific probe on longitudinal sections through vegetative apices of

729 Col-0 plants grown in ON and LN soils. Abbreviations: days after germination

730 (DAG); days after shift (DAS). Data represents mean, error bars are standard

731 deviations (s.d.),  $n=3$ , statistically significant difference between ON and LN

732 (Student's *t*-test, \* $P < 0.05$ , \*\* $P < 0.01$ , \*\*\* $P < 0.001$ ). Star indicates apex summit.

733 **Figure 3. *FLOWERING LOCUS C* and SHORT VEGETATIVE PHASE are**  
734 **required for the limited nitrogen-dependent flowering response. (A)**

735 Flowering time of Col-0 wild-type plants treated with an 8-week period of cold.

736 Note that afterwards plants were transferred to 22°C until flowering. **(B)**

737 Flowering time of Col-0, *f1c-3*, and *svp-32* mutant plants grown under short-day

738 (8h light/16h darkness) conditions. Data represents mean, error bars are

739 standard deviations (s.d.),  $n \geq 15$  individual plants per genotype, statistically

740 significant difference between ON and LN (Student's *t*-test, \*\*\* $P < 0.001$ ).

741 **Figure 4. FLOWERING LOCUS C expression downstream of NIN-LIKE**  
742 **PROTEIN 6 (NLP6) and NIN-LIKE PROTEIN 7 (NLP7).** Expression of  
743 *FLOWERING LOCUS C* measured by RT-qPCR at 10 days after germination  
744 (DAG) in rosettes of Col-0, *nlp6-2,nlp7-1*, and *nlp6-2,nlp7-1* plants. Data  
745 represents mean, error bars are standard deviations (s.d.), n=3, statistically  
746 significant difference compared to Col-0 wild-type (Student's *t*-test, \**P*<0.05,  
747 \*\**P*<0.01).

748 **Figure 5. Trehalose 6-phosphate pathway and nitrogen-signaling**  
749 **converge at FLOWERING LOCUS C. (A, B, C)** Expression of *FLOWERING*  
750 *LOCUS C* measured by RT-qPCR in (A) rosettes of wild-type Col-0 and  
751 *35S::amiRTPS1* plants grown in optimal nitrogen (ON) and limited-nitrogen  
752 (LN) conditions under short days (8h light/ 16h dark) at 60 days after  
753 germination (DAG), in (B) apices and (C) rosettes of wild-type Col-0, *tps1-*  
754 *2,GVG:TPS1*, *snf4,tps1-2,GVG:TPS1* and *kin10,tps1-2,GVG:TPS1* plants  
755 grown in standard soil under long days (16h light/ 8h dark). Data represents  
756 mean, error bars are standard deviations (s.d.), statistically significant  
757 difference compared to Col-0 wild-type (Student *t*-test, \**P*<0.05, \*\**P*<0.01, and  
758 \*\*\**P*<0.001).

759 **Figure 6. Carbon and nitrogen signaling target similar components of the**  
760 **flowering network in the shoot apical meristem for the proper timing of**  
761 **flowering.** *FLOWERING LOCUS C*, a key repressor of flowering, is not only  
762 regulated by cold temperature as part of the vernalization process, but is also  
763 affected by nutrient availability. The Trehalose 6-phosphate pathway negatively  
764 impacts *FLOWERING LOCUS C* via SUCROSE NON-FERMENTING 1  
765 RELATED KINASE 1. Nitrogen signaling controls *FLOWERING LOCUS C* via  
766 a yet to identify mechanism involving NIN-LIKE PROTEIN 7. The repressor  
767 complex composed of *FLOWERING LOCUS C* and SVP is eventually tuned by  
768 the adjustment of *FLOWERING LOCUS C* expression downstream of both  
769 carbon and nitrogen signaling to control *SUPPRESSOR OF*  
770 *OVEREXPRESSION OF CONSTANS 1* in the shoot apical meristem.  
771 Independently, both nutrient pathways work via the age pathway (*SQUAMOSA*  
772 *PROMOTER-BINDING PROTEIN-LIKE 3-5*) to induce flowering.



773 **Supplemental Material**

- Supplemental Figure S1.** *MADS AFFECTING FLOWERING 5* in *35S::amiRTPS1* plants.
- Supplemental Figure S2.** *f1c-3* partially suppresses the delayed vegetative phase change phenotype of *tps1-2,GVG::TPS1* plants.
- Supplemental Figure S3.** *MADS AFFECTING FLOWERING 5* in response to nitrogen limitation.
- Supplemental Figure S4.** *SHORT VEGETATIVE PHASE* in *35S::amiRTPS1* plants.
- Supplemental Figure S5.** *SHORT VEGETATIVE PHASE* in response to nitrogen limitation.
- Supplemental Figure S6.** Regulators upstream *FLOWERING LOCUS C* in response to N limitation.
- Supplemental Figure S7.** Regulators upstream *FLOWERING LOCUS C* in *35S::amiRTPS1* plants.
- Supplemental Figure S8.** *FLOWERING LOCUS C* and *SHORT VEGETATIVE PHASE* in *sp1345* mutant plants.
- Supplemental Figure S9.** Plant phenotype of *nlp6* and *nlp7* mutant plants.
- Supplemental Figure S10.** *FLOWERING LOCUS D* in *snrk1,tps1-2,GVG::TPS1* mutants.
- Supplemental Table S1.** Flowering time data of experiments described in this study (Figure S2).
- Supplemental Table S2.** Vegetative phase change data of experiment described in this study
- Supplemental Table S3.** Putative nitrate responsive *cis*-elements (NREs) in regulators upstream *FLOWERING LOCUS C*.
- Supplemental Table S4.** Oligonucleotides used in this study.

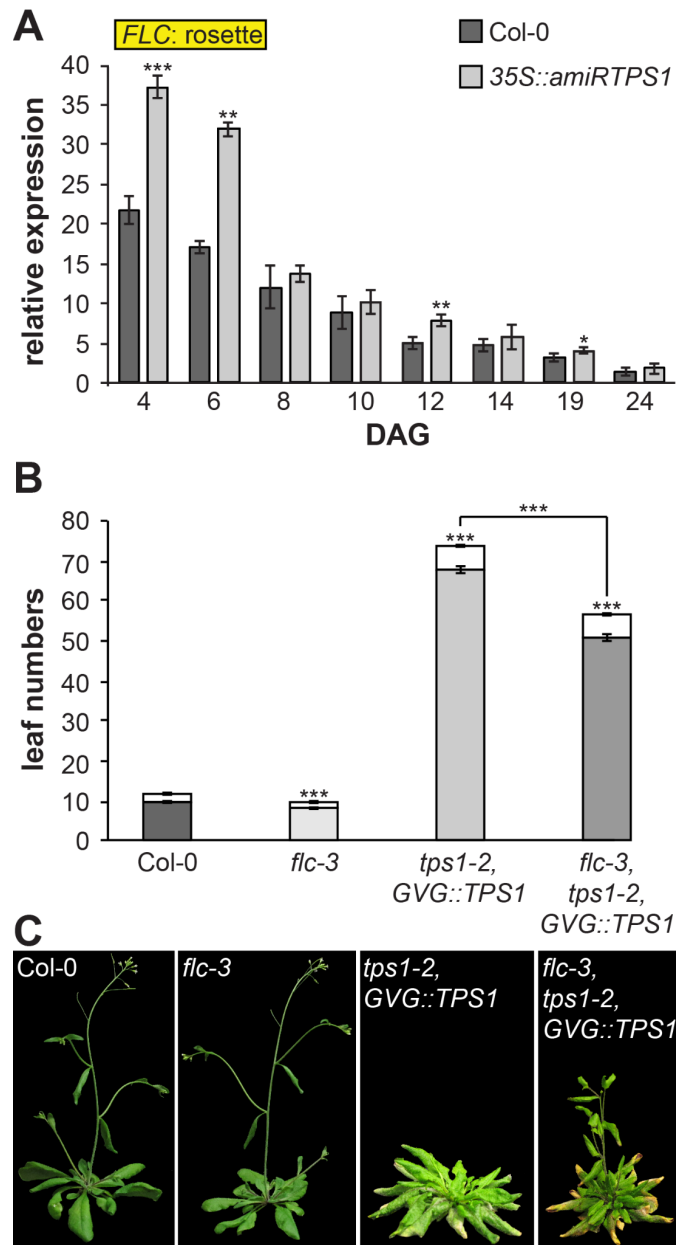

**Figure 1. The Trehalose 6-phosphate pathway impacts on *FLOWERING LOCUS C*.** (A) Expression of *FLOWERING LOCUS C* measured by RT-qPCR in rosettes of Col-0 and 35S::amiRTPS1 plants grown under long days (16h light/ 8h darkness).  $n = 4$ . (B) Flowering time measured as leaf numbers (rosette leaves in gray; cauline leaves in white).  $n \geq 15$  individual plants per genotype. (C) Representative photographs of the plants analyzed in (B). Abbreviations: days after germination (DAG). Data represents mean, error bars are standard deviations (s.d.), statistically significant difference compared to Col-0 wild-type (Student *t*-test, \* $P < 0.05$ , \*\* $P < 0.01$ , and \*\*\* $P < 0.001$ ).

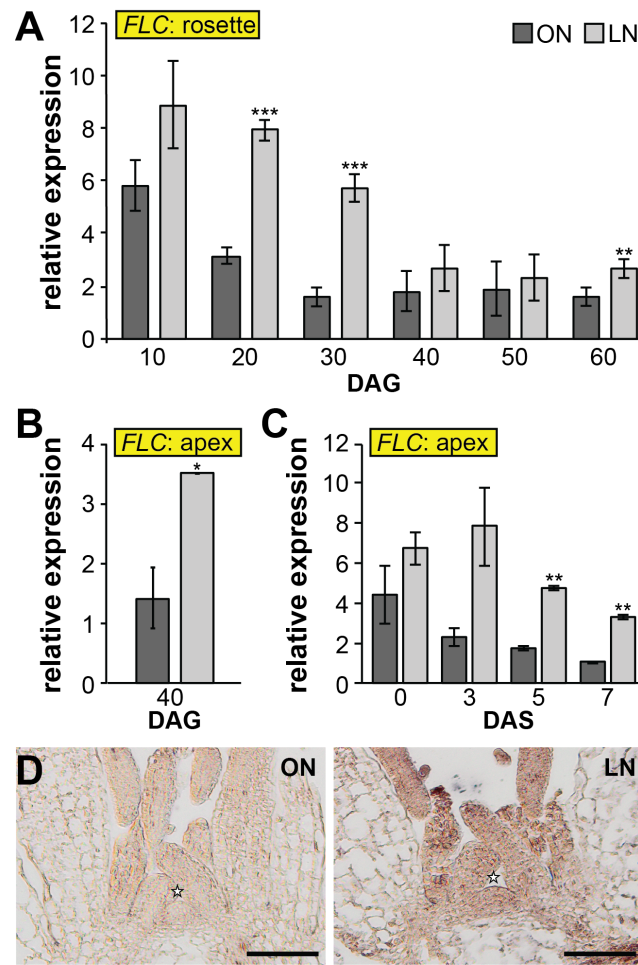

**Figure 2. *FLOWERING LOCUS C* in response to nitrogen limitation. (A, B)** Expression of *FLOWERING LOCUS C* measured by RT-qPCR in rosettes (A) and apices (B) of Col-0 plants grown in optimal nitrogen (ON) and limited-nitrogen (LN) conditions under short days (16h light/ 8h dark). (C) *FLC* expression measured by RT-qPCR in apices of plants initially grown under short days (30 days) and then transferred to long days to initiate the floral transition for 3, 5, and 7 days. (D) RNA *in situ* hybridization using *FLOWERING LOCUS C* specific probe on longitudinal sections through vegetative apices of Col-0 plants grown in ON and LN soils. Abbreviations: days after germination (DAG); days after shift (DAS). Data represents mean, error bars are standard deviations (s.d.), n=3, statistically significant difference between ON and LN (Student's *t*-test, \* $P < 0.05$ , \*\* $P < 0.01$ , \*\*\* $P < 0.001$ ). Star indicates apex summit.

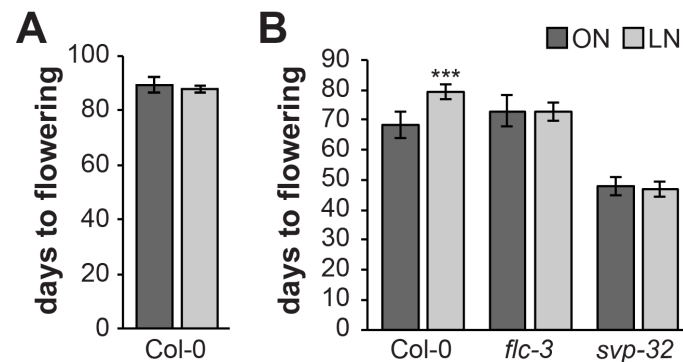

**Figure 3. FLOWERING LOCUS C and SHORT VEGETATIVE PHASE are required for the limited nitrogen-dependent flowering response. (A)** Flowering time of Col-0 wild-type plants treated with an 8-week period of cold. Note that afterwards plants were transferred to 22°C until flowering. **(B)** Flowering time of Col-0, *flc-3*, and *svp-32* mutant plants grown under short-day (8h light/16h darkness) conditions. Data represents mean, error bars are standard deviations (s.d.),  $n \geq 15$  individual plants per genotype, statistically significant difference between ON and LN (Student's *t*-test, \*\*\* $P < 0.001$ ).

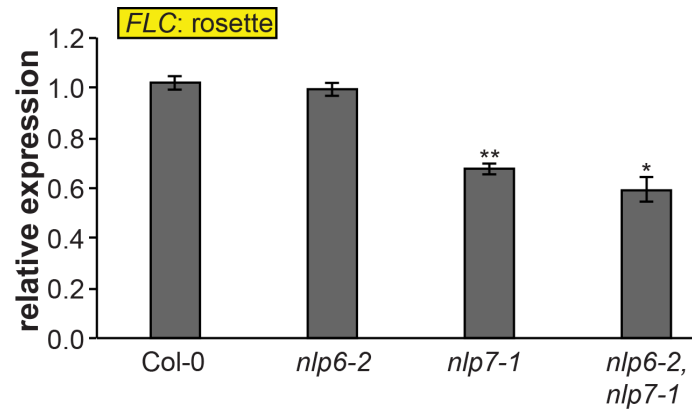

**Figure 4. *FLOWERING LOCUS C* expression downstream of NIN-LIKE PROTEIN 6 (NLP6) and NIN-LIKE PROTEIN 7 (NLP7).** Expression of *FLOWERING LOCUS C* measured by RT-qPCR at 10 days after germination (DAG) in rosettes of Col-0, *nlp6-2*, *nlp7-1*, and *nlp6-2;nlp7-1* plants. Data represents mean, error bars are standard deviations (s.d.), n=3, statistically significant difference compared to Col-0 wild-type (Student's *t*-test, \* $P < 0.05$ , \*\* $P < 0.01$ ).

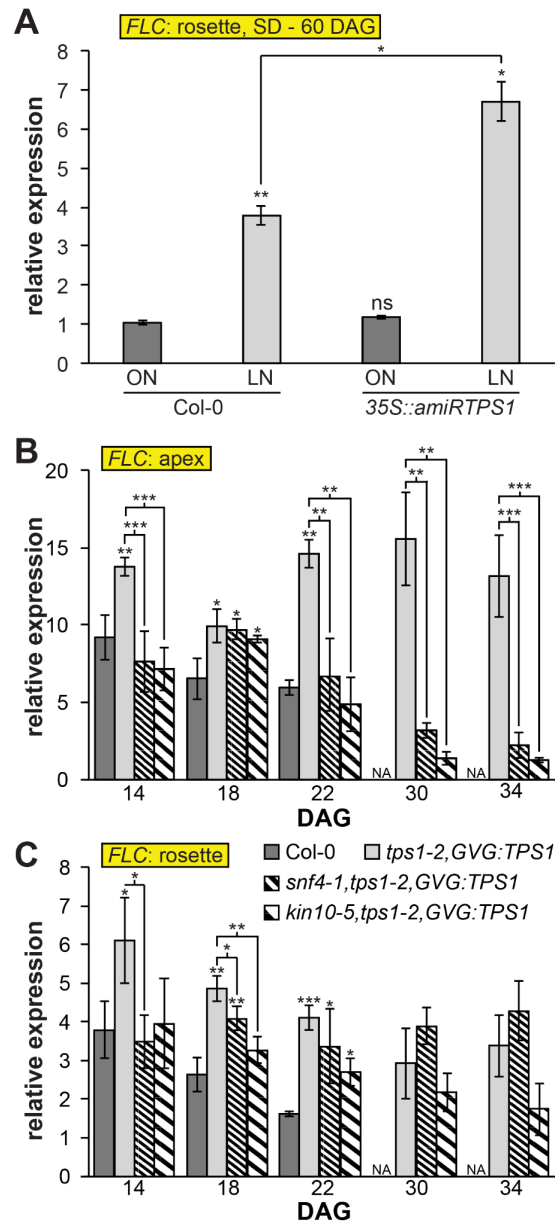

**Figure 5. Trehalose 6-phosphate pathway and nitrogen-signaling converge at *FLOWERING LOCUS C*.** (A, B, C) Expression of *FLOWERING LOCUS C* measured by RT-qPCR in (A) rosettes of wild-type Col-0 and *35S::amiRTPS1* plants grown in optimal nitrogen (ON) and limited-nitrogen (LN) conditions under short days (8h light/ 16h dark) at 60 days after germination (DAG), in (B) apices and (C) rosettes of wild-type Col-0, *tps1-2, GVG:TPS1*, *snf4-1, tps1-2, GVG:TPS1* and *kin10-5, tps1-2, GVG:TPS1* plants grown in standard soil under long days (16h light/ 8h dark). Data represents mean, error bars are standard deviations (s.d.), significant difference compared to Col-0 wild-type (Student *t*-test, \* $P < 0.05$ , \*\* $P < 0.01$ , and \*\*\* $P < 0.001$ ).

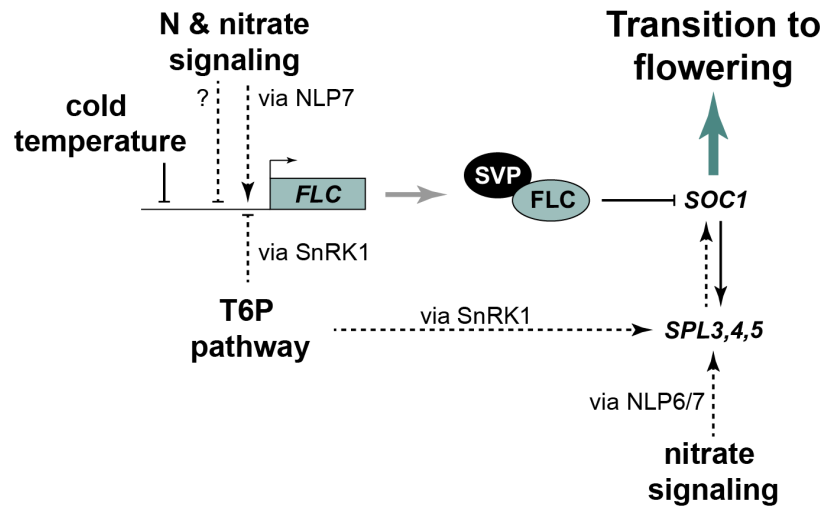

**Figure 6. Carbon and nitrogen signaling target similar components of the flowering network in the shoot apical meristem for the proper timing of flowering.** *FLOWERING LOCUS C*, a key repressor of flowering, is not only regulated by cold temperature as part of the vernalization process, but is also affected by nutrient availability. The Trehalose 6-phosphate pathway negatively impacts *FLOWERING LOCUS C* via *SUCROSE NON-FERMENTING 1 RELATED KINASE 1*. Nitrogen signaling controls *FLOWERING LOCUS C* via a yet to identify mechanism involving *NIN-LIKE PROTEIN 7*. The repressor complex composed of *FLOWERING LOCUS C* and *SVP* is eventually tuned by the adjustment of *FLOWERING LOCUS C* expression downstream of both carbon and nitrogen signaling to control *SUPPRESSOR OF OVEREXPRESSION OF CONSTANS 1* in the shoot apical meristem. Independently, both C and N pathways work via the age pathway (*SQUAMOSA PROMOTER-BINDING PROTEIN-LIKE 3-5*) to induce flowering.
